# Supplementary material for: Accuracy of Continuous Glucose Monitoring During Three Closed-Loop Home Studies Under Free-Living Conditions
Source: PubMed Central journal article supplement (PMC4649721; doi:10.1089/dia.2015.0062), 2015-11-01
Supplement: Supp_Fig1.pdf [file Supp_Fig1.pdf]

## Supplementary Data

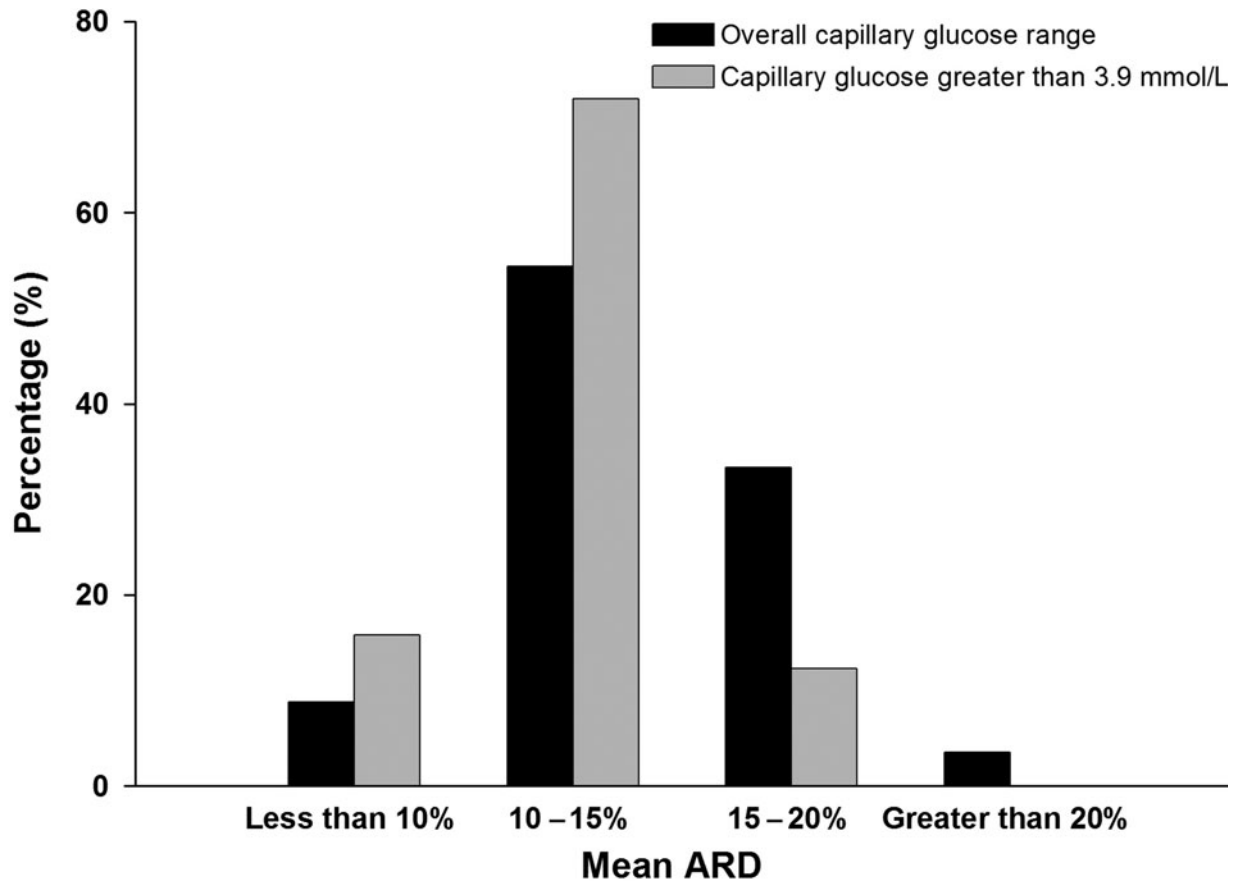

**SUPPLEMENTARY FIG. S1.** Distribution of mean absolute relative difference (ARD) among participants ( $n=57$ ). The plot shows the percentage of participants with participant-level mean ARD within the given ranges. The participant-level mean ARD is calculated using sensor-capillary glucose pairs across the whole glucose range (black bars) and in non-hypoglycemia (gray bars).
