# Supplementary material for: Accuracy of Continuous Glucose Monitoring During Three Closed-Loop Home Studies Under Free-Living Conditions
Source: PubMed Central journal article supplement (PMC4649721; doi:10.1089/dia.2015.0062), 2015-11-01
Supplement: Supp_Table1.pdf [file Supp_Table1.pdf]

SUPPLEMENTARY TABLE S1. CLINICAL CHARACTERISTICS AND DEMOGRAPHICS OF PARTICIPANTS ACCORDING TO SENSOR ACCURACY (MEAN ABSOLUTE RELATIVE DIFFERENCE) QUANTILES Q1–Q4

|                                          | <i>MARD (%) quartiles</i> |                         |                         |                         |
|------------------------------------------|---------------------------|-------------------------|-------------------------|-------------------------|
|                                          | <i>Q1 (8.51–11.95)</i>    | <i>Q2 (11.96–13.61)</i> | <i>Q3 (13.62–16.13)</i> | <i>Q4 (16.14–21.85)</i> |
| Age (years)                              | 34.6 (16.7, 42.9)         | 45.1 (33.5, 48.8)       | 20.1 (16.5, 34.2)       | 31.8 (27.0, 38.9)       |
| BMI (kg/m <sup>2</sup> )                 | 25.3±4.6                  | 25.0±3.9                | 23.8±3.1                | 25.3±3.0                |
| Duration of diabetes (years)             | 10.0 (4.8, 28.0)          | 21.5 (10.0, 39.0)       | 13.2 (7.2, 20.3)        | 20.9 (17, 24.5)         |
| HbA1c (%)                                | 8.2±1.1                   | 7.8±0.9                 | 7.8±0.6                 | 7.8±0.7                 |
| Mean glucose (mmol/L)                    | 8.7±1.5                   | 8.9±1.0                 | 8.6±0.8                 | 8.6±0.6                 |
| SD of sensor glucose (mmol/L)            | 3.0±0.5                   | 2.8±0.5                 | 3.0±0.3                 | 3.3±0.5                 |
| Proportion of time spent <3.9 mmol/L (%) | 2.2 (1.5, 5.2)            | 1.7 (1.1, 2.2)          | 2.9 (1.9, 6.1)          | 4.9 (2.8, 8.5)          |

Data are mean ±SD or median (interquartile range) values as indicated.

BMI, body mass index; HbA1c, hemoglobin A1c; MARD, mean absolute relative difference; Q, quartile.
