# Supplementary material for: Accuracy of Continuous Glucose Monitoring During Three Closed-Loop Home Studies Under Free-Living Conditions
Source: PubMed Central journal article supplement (PMC4649721; doi:10.1089/dia.2015.0062), 2015-11-01
Supplement: Supp_Table2.pdf [file Supp_Table2.pdf]

SUPPLEMENTARY TABLE S2. COMPARISON OF MEAN ABSOLUTE RELATIVE DIFFERENCE ACCORDING TO CLINICAL CHARACTERISTICS AND DEMOGRAPHICS DATA DIVIDED INTO QUARTILES Q1–Q4

|                                          | <i>MARD (%)</i>   |
|------------------------------------------|-------------------|
| Age (years)                              |                   |
| Q1 (12.3–17.9)                           | 12.2 (10.5, 13.7) |
| Q2 (18.0–33.0)                           | 16.7 (15.6, 17.2) |
| Q3 (33.5–42.9)                           | 13.2 (11.0, 14.8) |
| Q4 (43.1–68.8)                           | 12.5 (12.1, 13.6) |
| BMI (kg/m <sup>2</sup> )                 |                   |
| Q1 (18.0–21.8)                           | 13.2±2.9          |
| Q2 (22.0–24.6)                           | 15.2±3.4          |
| Q3 (25.0–27.5)                           | 14.7±2.6          |
| Q4 (27.8–34.6)                           | 12.6±2.7          |
| Duration of diabetes (years)             |                   |
| Q1 (1.7–9.2)                             | 12.1 (9.9, 14.5)  |
| Q2 (9.8–18.0)                            | 13.7 (12.5, 16.8) |
| Q3 (19.2–28)                             | 14.8 (12.0, 17.0) |
| Q4 (28.7–56.0)                           | 12.9 (11.6, 14.8) |
| HbA1c (%)                                |                   |
| Q1 (6.1–7.4)                             | 14.2±3.1          |
| Q2 (7.5–7.9)                             | 14.4±3.1          |
| Q3 (8.0–8.6)                             | 14.3±3.0          |
| Q4 (8.7–9.6)                             | 12.2±2.5          |
| Mean glucose (mmol/L)                    |                   |
| Q1 (6.6–8.0)                             | 13.0±3.3          |
| Q2 (8.1–8.7)                             | 16.1±2.8          |
| Q3 (8.8–9.5)                             | 14.1±2.6          |
| Q4 (9.6–10.8)                            | 12.5±1.9          |
| SD of sensor glucose (mmol/L)            |                   |
| Q1 (1.9–2.7)                             | 13.5±3.1          |
| Q2 (2.8–3.0)                             | 12.9±2.0          |
| Q3 (3.1–3.4)                             | 14.0±3.3          |
| Q4 (3.5–4.2)                             | 15.3±3.2          |
| Proportion of time spent <3.9 mmol/L (%) |                   |
| Q1 (0.3–1.7)                             | 12.2 (11.0, 13.3) |
| Q2 (1.7–2.4)                             | 12.5 (12.0, 16.1) |
| Q3 (2.8–5.2)                             | 15.1 (12.2, 17.0) |
| Q4 (5.7–13.2)                            | 15.6 (13.4, 16.9) |

Data are mean±SD or median (interquartile range) as indicated. BMI, body mass index; HbA1c, hemoglobin A1c; MARD, mean absolute relative difference; Q, quartile.
